# Supplementary material
Source: PubMed Central journal article supplement (PMC5141945)
Supplement: supp_kww075_kww075WyssWebMaterialFinal.pdf [file supp_kww075_kww075WyssWebMaterialFinal.pdf]

**Web Table 1.** Characteristics of US Studies with Information on Snuff Use and Chewing Tobacco in the International Head and Neck Cancer Epidemiology (INHANCE) Consortium, 1981–2006

| Study Location (Reference No.) <sup>a</sup> | Recruitment Period | Age Eligibility | Case Source     | Case Participation Rate, % | Control Source                               | Control Participation Rate, % | Matched Factors                       | Definition of Snuff Use and Chewing Tobacco Use |
|---------------------------------------------|--------------------|-----------------|-----------------|----------------------------|----------------------------------------------|-------------------------------|---------------------------------------|-------------------------------------------------|
| Seattle (1, 2)                              | 1985–1995          | 18–65           | Cancer registry | 54.4,63.3 <sup>a</sup>     | Random digit dialing                         | 63.0,60.9 <sup>b</sup>        | Age, sex                              | Six months or longer                            |
| Iowa (3)                                    | 1993–2006          | >18             | Hospital        | 87                         | Hospital – unhealthy                         | 92                            | Age, sex                              | One can/pouch a week for at least a year        |
| Los Angeles (4)                             | 1999–2004          | 18–65           | Cancer registry | 49                         | Neighborhood                                 | 68                            | Age, sex, neighborhood                | Six months or longer                            |
| Houston (5)                                 | 2001–2006          | ≥18             | Hospital        | 95                         | Hospital visitors                            | >80                           | Age, sex, ethnicity                   | Ever use                                        |
| Boston (6)                                  | 1999–2003          | ≥18             | Hospital        | 88.7                       | Residential records                          | 48.7                          | Age, sex, neighborhood                | Ever use                                        |
| Baltimore (7)                               | 2000–2005          | NA              | Hospital        | 100                        | Hospital – benign conditions                 | 70                            | age, sex, HPV status                  | Daily for longer than one year                  |
| North Carolina (8)                          | 1996–1997          | >17             | Hospital        | 88                         | Hospital – unhealthy                         | 86                            | Age, sex                              | Six months or longer                            |
| North Carolina (9)                          | 2002–2006          | 20–80           | Cancer registry | 82                         | DMV files                                    | 61                            | Age, sex, ethnicity                   | 20 times or more entire life                    |
| New York MSKCC (10)                         | 1992–1994          | NA              | Hospital        | —                          | Blood donors                                 | —                             | Age, sex                              | Ever use                                        |
| New York multicenter (11)                   | 1981–1990          | 21–80           | Hospital        | 91                         | Hospital – unhealthy                         | 97                            | Age, sex, hospital, year of interview | Once a week for at least a year                 |
| US multicenter (12)                         | 1983–1984          | 18–79           | Cancer registry | 75                         | Random digit dialing and health care rosters | 76                            | Age, sex, ethnicity                   | Six months or longer                            |

MSKCC, Memorial-Sloan Kettering Cancer Center; DMV, Department of Motor Vehicles.

<sup>a</sup>Publications referenced are representative of the study and do not necessarily report estimates for smokeless tobacco.

<sup>b</sup>Two response rates are reported because data were collected at two time points: 1985 to 1989 among men and 1990 to 1995 among men and women.

**Web Table 2.** Odds Ratios for Snuff Use and Head and Neck Cancer Among Ever Cigarette Smokers Stratified by Former and Current Cigarette Smoking in the International Head and Neck Cancer Epidemiology (INHANCE) Consortium, US Studies, 1981–2006

| Snuff Use <sup>a</sup>                 | Former Cigarette Smokers |          |                 |            | Current Cigarette Smokers |          |                 |            |
|----------------------------------------|--------------------------|----------|-----------------|------------|---------------------------|----------|-----------------|------------|
|                                        | Cases                    | Controls | OR <sup>c</sup> | 95% CI     | Cases                     | Controls | OR <sup>c</sup> | 95% CI     |
| Never <sup>b</sup>                     | 1485                     | 2715     | 1.00            | Referent   | 3423                      | 1730     | 1.00            | Referent   |
| Ever                                   | 75                       | 116      | 0.85            | 0.60, 1.21 | 92                        | 48       | 0.86            | 0.57, 1.31 |
| Missing                                | 0                        | 1        |                 |            | 3                         | 0        |                 |            |
| <b>Frequency (per day)<sup>d</sup></b> |                          |          |                 |            |                           |          |                 |            |
| Never                                  | 1161                     | 1986     | 1.00            | Referent   | 2411                      | 1195     | 1.00            | Referent   |
| >0 to ≤2                               | 39                       | 74       | 0.72            | 0.44, 1.18 | 56                        | 30       | 0.70            | 0.40, 1.23 |
| >2                                     | 26                       | 31       | 0.78            | 0.40, 1.51 | 12                        | 6        | 0.81            | 0.25, 2.62 |
| Missing                                | 3                        | 2        |                 |            | 12                        | 2        |                 |            |
| <b>Duration (years)</b>                |                          |          |                 |            |                           |          |                 |            |
| Never                                  | 1485                     | 2715     | 1.00            | Referent   | 3423                      | 1730     | 1.00            | Referent   |
| >0 to ≤20                              | 61                       | 97       | 0.85            | 0.58, 1.26 | 73                        | 43       | 0.77            | 0.49, 1.21 |
| >20                                    | 13                       | 17       | 0.86            | 0.36, 2.03 | 18                        | 5        | 1.45            | 0.46, 4.55 |
| Missing                                | 1                        | 3        |                 |            | 4                         | 0        |                 |            |

CI, confidence interval; OR, odds ratio.

<sup>a</sup>Boston study excluded from analyses of snuff use since information on snuff use not available.

<sup>b</sup>Never defined as never using snuff. Ever defined as ever using snuff.

<sup>c</sup>Odds ratios adjusted for sex, age (years), race (white, black, Hispanic, Asian and Pacific Islander, and other races/ethnicities), education (junior high school or less, some high school, high school graduate, technical school or some college, and college graduate or more), frequency of alcohol use (ml/day truncated at the 95<sup>th</sup> percentile among alcohol drinkers to account for extreme values), duration of cigar smoking (years), duration of pipe smoking (years), and duration of cigarette smoking (years).

<sup>d</sup>New York multicenter and Seattle studies excluded from analyses of snuff use frequency since information on frequency was not available or not easily standardized with other studies.

**Web Table 3.** Odds Ratios for Tobacco Chewing and Head and Neck Cancer Stratified by Cigarette Smoking in the International Head and Neck Cancer Epidemiology (INHANCE) Consortium, US Studies, 1981–2006

| Tobacco Chewing                        | Former Cigarette Smokers |          |                 |            | Current Cigarette Smokers |          |                 |            |
|----------------------------------------|--------------------------|----------|-----------------|------------|---------------------------|----------|-----------------|------------|
|                                        | Cases                    | Controls | OR <sup>b</sup> | 95% CI     | Cases                     | Controls | OR <sup>b</sup> | 95% CI     |
| Never <sup>a</sup>                     | 1610                     | 2914     | 1.00            | Referent   | 3499                      | 1789     | 1.00            | Referent   |
| Ever                                   | 158                      | 229      | 0.97            | 0.75, 1.26 | 223                       | 92       | 1.00            | 0.74, 1.35 |
| Missing                                | 1                        | 1        |                 |            | 2                         | 0        |                 |            |
| <b>Frequency (per day)<sup>c</sup></b> |                          |          |                 |            |                           |          |                 |            |
| Never                                  | 1290                     | 2204     | 1.00            | Referent   | 2507                      | 1266     | 1.00            | Referent   |
| >0 to ≤2                               | 110                      | 165      | 0.92            | 0.67, 1.27 | 162                       | 61       | 0.94            | 0.64, 1.37 |
| >2                                     | 28                       | 27       | 1               | 0.52, 1.93 | 15                        | 6        | 0.33            | 0.34, 3.28 |
| Missing                                | 10                       | 9        |                 |            | 13                        | 3        |                 |            |
| <b>Duration (years)</b>                |                          |          |                 |            |                           |          |                 |            |
| Never                                  | 1610                     | 2914     | 1.00            | Referent   | 3499                      | 1789     | 1.00            | Referent   |
| >0 to ≤20                              | 97                       | 160      | 0.88            | 0.65, 1.20 | 174                       | 66       | 1.09            | 0.78, 1.54 |
| >20                                    | 37                       | 50       | 1.07            | 0.64, 1.79 | 36                        | 17       | 0.71            | 0.35, 1.42 |
| Missing                                | 25                       | 20       |                 |            | 15                        | 9        |                 |            |

CI, confidence interval; OR, odds ratio.

<sup>a</sup>Never defined as never chewing tobacco. Ever defined as ever chewing tobacco.

<sup>b</sup>Odds ratios among never cigarette smokers adjusted for sex, age (years), race (white, black, Hispanic, Asian and Pacific Islander, and other races/ethnicities), education (junior high school or less, some high school, high school graduate, technical school or some college, and college graduate or more), frequency of alcohol use (ml/day truncated at the 95<sup>th</sup> percentile among alcohol drinkers to account for extreme values), duration of cigar smoking (years), duration of pipe smoking (years), and duration of cigarette smoking (years).

<sup>c</sup>New York multicenter and Seattle studies excluded from analyses of chewing tobacco frequency since information on frequency was not available or not easily standardized with other studies.

**Web Table 4.** Odds Ratios for Tobacco Chewing or Snuff Use and Head and Neck Cancer Among Never Cigarette Smoking Omitting One Study/Center at a Time, International Head and Neck Cancer Epidemiology (INHANCE) Consortium, US Studies, 1981–2006

| Study/Center Omitted <sup>a</sup> | Tobacco Chewing <sup>b</sup> |            | Snuff Use <sup>c</sup> |            |
|-----------------------------------|------------------------------|------------|------------------------|------------|
|                                   | OR <sup>d</sup>              | 95% CI     | OR <sup>d</sup>        | 95% CI     |
| New York multicenter              | 1.14                         | 0.76, 1.73 | 1.60                   | 1.00, 2.57 |
| Seattle (1985–1989)               | 1.21                         | 0.81, 1.80 | 1.74                   | 1.09, 2.78 |
| Seattle (1990–1995)               | 1.20                         | 0.81, 1.77 | 1.75                   | 1.11, 2.78 |
| Iowa                              | 1.23                         | 0.82, 1.86 | 2.05                   | 1.27, 3.32 |
| North Carolina (1994–1997)        | 1.17                         | 0.78, 1.74 | 1.54                   | 0.95, 2.48 |
| Los Angeles                       | 1.28                         | 0.86, 1.90 | 1.84                   | 1.15, 2.95 |
| Houston                           | 1.19                         | 0.77, 1.85 | 1.77                   | 1.03, 3.04 |
| Boston                            | 1.16                         | 0.78, 1.73 | --                     | --         |
| US multicenter — Atlanta          | 1.25                         | 0.84, 1.86 | 1.72                   | 1.07, 2.77 |
| US multicenter — Los Angeles      | 1.22                         | 0.82, 1.82 | 1.69                   | 1.06, 2.69 |
| US multicenter — New Jersey       | 1.18                         | 0.80, 1.76 | 1.64                   | 1.03, 2.62 |
| US multicenter — San Francisco    | 1.22                         | 0.82, 1.81 | 1.72                   | 1.09, 2.74 |
| New York (MSKCC)                  | 1.13                         | 0.76, 1.68 | 1.72                   | 1.09, 2.73 |
| North Carolina (2002–2006)        | 1.18                         | 0.75, 1.86 | 1.63                   | 0.94, 2.81 |
| Baltimore                         | 1.22                         | 0.82, 1.81 | 1.72                   | 1.08, 2.72 |

<sup>a</sup>Estimates from models which include all studies except study specified.

<sup>b</sup>Odds ratios for ever users compared to never users where never user defined as never chewing tobacco and ever user defined as ever chewing tobacco.

<sup>c</sup>Odds ratios for ever users compared to never users where never user defined as never using snuff and ever user defined as ever using snuff.

<sup>d</sup>Odds ratios among never cigarette smokers adjusted for sex, age (years), race (white, black, Hispanic, Asian and Pacific Islander, and other races/ethnicities), education (junior high school or less, some high school, high school graduate, technical school or some college, and college graduate or more), frequency of alcohol use (ml/day truncated at the 95<sup>th</sup> percentile among alcohol drinkers to account for extreme values), duration of cigar smoking (years), and duration of pipe smoking (years).

**Web Table 5.** Odds Ratios for Snuff Use and Head and Neck Cancer Stratified by Cigarette Smoking in the International Head and Neck Cancer Epidemiology (INHANCE) Consortium, US Studies, Sensitivity Analysis Across Various Adjustment Sets, 1981–2006

| Snuff Use <sup>a</sup>                 | Never Cigarette Smokers  |            |                       |            | Ever Cigarette Smokers   |            |                       |            |
|----------------------------------------|--------------------------|------------|-----------------------|------------|--------------------------|------------|-----------------------|------------|
|                                        | Reduced Adj <sup>c</sup> |            | Full Adj <sup>d</sup> |            | Reduced Adj <sup>c</sup> |            | Full Adj <sup>d</sup> |            |
|                                        | OR                       | 95% CI     | OR                    | 95% CI     | OR                       | 95% CI     | OR                    | 95% CI     |
| Never <sup>b</sup>                     | 1.00                     | Referent   | 1.00                  | Referent   | 1.00                     | Referent   | 1.00                  | Referent   |
| Ever                                   | 1.69 <sup>f</sup>        | 1.07, 2.66 | 1.70                  | 1.05, 2.74 | 0.79 <sup>f</sup>        | 0.61, 1.04 | 0.86                  | 0.65, 1.13 |
| <b>Frequency (per day)<sup>e</sup></b> |                          |            |                       |            |                          |            |                       |            |
| Never                                  | 1.00                     | Referent   | 1.00                  | Referent   | 1.00                     | Referent   | 1.00                  | Referent   |
| >0 to ≤2                               | 1.47                     | 0.83, 2.63 | 1.52                  | 0.82, 2.82 | 0.64                     | 0.45, 0.93 | 0.73                  | 0.49, 1.06 |
| >2                                     | 1.34                     | 0.46, 3.90 | 1.41                  | 0.49, 4.10 | 0.74                     | 0.42, 1.33 | 0.76                  | 0.43, 1.36 |
| <b>Duration (years)</b>                |                          |            |                       |            |                          |            |                       |            |
| Never                                  | 1.00                     | Referent   | 1.00                  | Referent   | 1.00                     | Referent   | 1.00                  | Referent   |
| >0 to ≤20                              | 1.53                     | 0.79, 2.96 | 1.51                  | 0.77, 2.94 | 0.77                     | 0.57, 1.03 | 0.82                  | 0.61, 1.11 |
| >20                                    | 1.70                     | 0.90, 3.19 | 1.73                  | 0.88, 3.39 | 0.99                     | 0.50, 1.95 | 1.17                  | 0.58, 2.37 |

CI, confidence interval; OR, odds ratio.

<sup>a</sup>Boston study excluded from analyses of snuff use since information on snuff use not available.

<sup>b</sup>Never defined as never using snuff. Ever defined as ever using snuff.

<sup>c</sup>Odds ratios adjusted for sex, age (years), race (white, black, Hispanic, Asian and Pacific Islander, and other races/ethnicities), education (junior high school or less, some high school, high school graduate, technical school or some college, and college graduate or more), and frequency of alcohol use (ml/day truncated at the 95<sup>th</sup> percentile among alcohol drinkers to account for extreme values). Odds ratios among ever cigarette smokers adjusted for same variables plus duration of cigarette smoking (years).

<sup>d</sup>Odds ratios adjusted for sex, age (years), race (white, black, Hispanic, Asian and Pacific Islander, and other races/ethnicities), education (junior high school or less, some high school, high school graduate, technical school or some college, and college graduate or more), frequency of alcohol use (ml/day truncated at the 95<sup>th</sup> percentile among alcohol drinkers to account for extreme values), duration of cigar smoking use (years), duration of pipe smoking (years), and duration of tobacco chewing (years). Odds ratios among ever cigarette smokers adjusted for same variables plus duration of cigarette smoking (years). 82 individuals drop from analyses for missing data on duration of chewing tobacco.

<sup>e</sup>New York multicenter and Seattle studies excluded from analyses of snuff use frequency since information on frequency was not available or not easily standardized with other studies.

<sup>f</sup>Although ORs were not adjusted duration of cigar smoking or duration of pipe smoking, individuals with missing data for these variables were excluded to compare estimates from sensitivity analysis to estimates from main analysis. If such individuals were included, then the OR (95% CI) for ever snuff use would be 1.72 (1.09, 2.69) among never cigarette smokers and 0.81 (0.62, 1.05) among ever cigarette smokers.

**Web Table 6.** Odds Ratios for Tobacco Chewing and Head and Neck Cancer Stratified by Cigarette Smoking in the International Head and Neck Cancer Epidemiology (INHANCE) Consortium, US Studies, Sensitivity Analysis Across Various Adjustment Sets, 1981–2006

| Tobacco Chewing                        | Never Cigarette Smokers  |            |                       |            | Ever Cigarette Smokers   |            |                       |            |
|----------------------------------------|--------------------------|------------|-----------------------|------------|--------------------------|------------|-----------------------|------------|
|                                        | Reduced Adj <sup>b</sup> |            | Full Adj <sup>c</sup> |            | Reduced Adj <sup>b</sup> |            | Full Adj <sup>c</sup> |            |
|                                        | OR                       | 95% CI     | OR                    | 95% CI     | OR                       | 95% CI     | OR                    | 95% CI     |
| Never <sup>a</sup>                     | 1.00                     | Referent   | 1.00                  | Referent   | 1.00                     | Referent   | 1.00                  | Referent   |
| Ever                                   | 1.38 <sup>e</sup>        | 0.94, 2.01 | 1.00                  | 0.66, 1.52 | 0.93 <sup>e</sup>        | 0.76, 1.12 | 0.98                  | 0.80, 1.20 |
| <b>Frequency (per day)<sup>d</sup></b> |                          |            |                       |            |                          |            |                       |            |
| Never                                  | 1.00                     | Referent   | 1.00                  | Referent   | 1.00                     | Referent   | 1.00                  | Referent   |
| >0 to ≤2                               | 1.17                     | 0.71, 1.91 | 0.82                  | 0.47, 1.43 | 0.85                     | 0.67, 1.07 | 0.90                  | 0.70, 1.16 |
| >2                                     | 1.55                     | 0.61, 3.93 | 1.43                  | 0.55, 3.70 | 0.96                     | 0.54, 1.70 | 1.04                  | 0.58, 1.89 |
| <b>Duration (years)</b>                |                          |            |                       |            |                          |            |                       |            |
| Never                                  | 1.00                     | Referent   | 1.00                  | Referent   | 1.00                     | Referent   | 1.00                  | Referent   |
| >0 to ≤20                              | 1.39                     | 0.82, 2.37 | 1.05                  | 0.59, 1.85 | 0.94                     | 0.75, 1.17 | 0.98                  | 0.77, 1.23 |
| >20                                    | 1.31                     | 0.73, 2.34 | 0.83                  | 0.44, 1.58 | 0.82                     | 0.54, 1.24 | 0.88                  | 0.57, 1.37 |

CI, confidence interval; OR, odds ratio.

<sup>a</sup>Never defined as never chewing tobacco. Ever defined as ever chewing tobacco.

<sup>b</sup>Odds ratios adjusted for sex, age (years), race (white, black, Hispanic, Asian and Pacific Islander, and other races/ethnicities), education (junior high school or less, some high school, high school graduate, technical school or some college, and college graduate or more), and frequency of alcohol use (ml/day truncated at the 95<sup>th</sup> percentile among alcohol drinkers to account for extreme values). Odds ratios among ever cigarette smokers adjusted for same variables plus duration of cigarette smoking (years).

<sup>c</sup>Odds ratios adjusted for sex, age (years), race (white, black, Hispanic, Asian and Pacific Islander, and other races/ethnicities), education (junior high school or less, some high school, high school graduate, technical school or some college, and college graduate or more), frequency of alcohol use (ml/day truncated at the 95<sup>th</sup> percentile among alcohol drinkers to account for extreme values), duration of cigar smoking use (years), duration of pipe smoking (years), and duration of snuff use (years). Odds ratios among ever cigarette smokers adjusted for same variables plus duration of cigarette smoking (years). . 11 individuals drop from analyses for missing data on duration of snuff use.

<sup>d</sup>New York multicenter and Seattle studies excluded from analyses of chewing tobacco frequency since information on frequency was not available or not easily standardized with other studies.

<sup>e</sup>Although ORs were not adjusted duration of cigar smoking or duration of pipe smoking, individuals with missing data for these variables were excluded to compare estimates from sensitivity analysis to estimates from main analysis. If such individuals were included, then the OR (95% CI) for ever tobacco chewing would be 1.44 (0.99, 2.09) among never cigarette smokers and 0.93 (0.77, 1.12) among ever cigarette smokers.

## References

1. Schwartz SM, Daling JR, Doody DR, et al. Oral cancer risk in relation to sexual history and evidence of human papillomavirus infection. *J Natl Cancer Inst.* 1998;90(21):1626–1636.
2. Maden C, Beckmann AM, Thomas DB, et al. Human papillomaviruses, herpes simplex viruses, and the risk of oral cancer in men. *Am J Epidemiol.* 1992;135(10):1093–1102.
3. Smith EM, Hoffman HT, Summersgill KS, et al. Human papillomavirus and risk of oral cancer. *Laryngoscope.* 1998;108(7):1098–1103.
4. Hashibe M, Morgenstern H, Cui Y, et al. Marijuana use and the risk of lung and upper-aerodigestive-tract cancers: results of a population-based case-control study. *Cancer Epidemiol Biomarkers Prev.* 2006;15(10):1829–1834.
5. Zhang Z, Shi Q, Liu Z, et al. Polymorphisms of methionine synthase and methionine synthase reductase and risk of squamous cell carcinoma of the head and neck: a case-control analysis. *Cancer Epidemiol Biomarkers Prev.* 2005;14(5):1188–1193.
6. Zhou J, Michaud DS, Langevin SM, et al. Smokeless tobacco and risk of head and neck cancer: evidence from a case-control study in New England. *Int J Cancer.* 2013;132(8):1911–1917.
7. D'souza G, Kreimer AR, Viscidi R, et al. Case-control study of human papilloma virus and oropharyngeal cancer. *N Engl J Med.* 2007; 10;356(19):1944–1956.
8. Olshan AF, Weissler MC, Watson MA, et al. *GSTM1*, *GSTT1*, *GSTP1*, *CYP1A1*, and *NAT1* polymorphisms, tobacco use, and the risk of head and neck cancer. *Cancer Epidemiol Biomarkers Prev.* 2000;9(2):185–191.
9. Stingone JA, Funkhouser WK, Weissler MC, et al. Racial differences in the relationship between tobacco, alcohol, and squamous cell carcinoma of the head and neck. *Cancer Causes Control.* 2012; 4(4):649–664.
10. Schantz SP, Zhang ZF, Spitz MS, et al. Genetic susceptibility to head and neck cancer: interaction between nutrition and mutagen sensitivity. *Laryngoscope.* 1997;107(6):765–781.
11. Muscat JE, Richie JP Jr, Thompson S, et al. Gender differences in smoking and risk for oral cancer. *Cancer Res.* 1996;56(22):5192–5197.
12. Blot WJ, McLaughlin JK, Winn DM, et al. Smoking and drinking in relation to oral and pharyngeal cancer. *Cancer Res.* 1988;48(11):3282–3287.
